# Supplementary material
Source: PubMed Central journal article supplement (PMC1265746)
Supplement: molcellb_25_19_8520__1.pdf [file molcellb_25_19_8520__1.pdf]

## Supplemental Figure S1

### Characterization of mitochondrial preparations

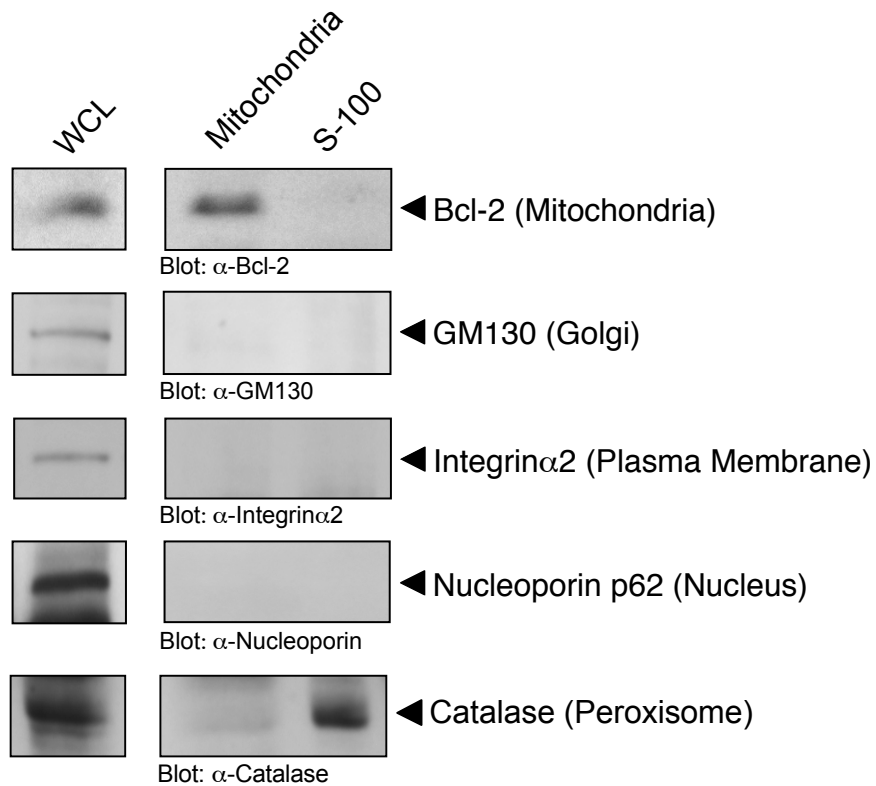

Whole cell lysates (WCL), mitochondrial preparations or the S100 fraction were immunoblotted against markers for mitochondria (anti-Bcl-2), Golgi (anti-GM130), plasma membranes (anti-integrin $\alpha$ 2), nuclei (anti-nucleoporin p62) or peroxisomes (anti-catalase).

## Supplemental Figure S2

### Specificity of the PKD1 and PKD2 RNAi

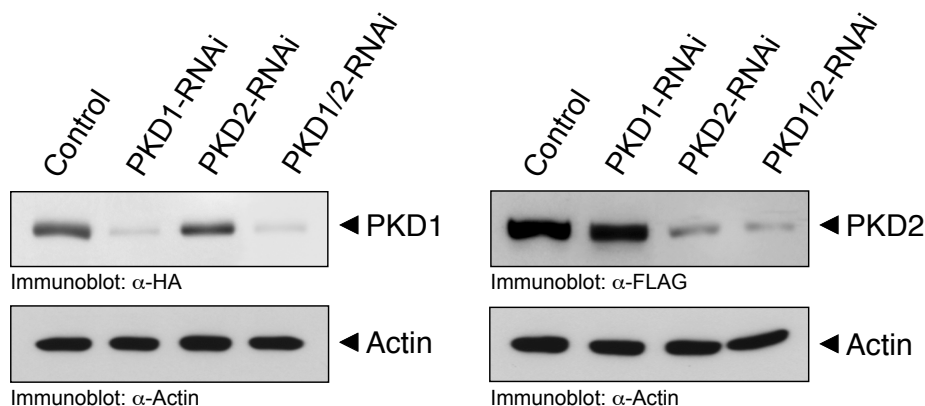

HeLa cells were transfected with vector control (pSuper), PKD1 RNAi or PKD2 RNAi (pSuper PKD1/pSuper PKD2) as indicated for 24 hr. Cells were transfected in a second transfection with HA-PKD1 or FLAG-PKD2. After 24 hr cells were analyzed for PKD1 or PKD2 expression using  $\alpha$ -HA (PKD1) or  $\alpha$ -FLAG (PKD2) antibodies. Analysis of actin expression ( $\alpha$ -actin) served as a loading control.

## Supplemental Figure S3

### Akt activation by oxidative stress is dependent on PI3K activity

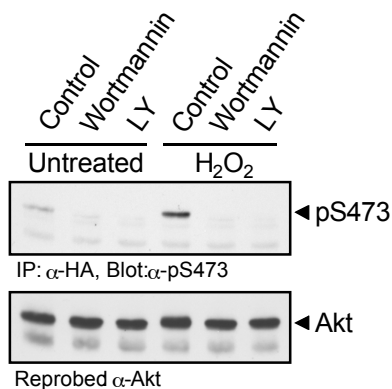

Cells were transfected with HA-tagged Akt, treated with Wortmannin (15 min, 100 nM) or LY294002 (15 min, 30  $\mu$ M) and then stimulated with H<sub>2</sub>O<sub>2</sub> (10  $\mu$ M, 10 min). Akt was immunoprecipitated. Samples were re-solved by SDS-PAGE, transferred to nitrocellulose and immunoblotted with  $\alpha$ -pS473 antibody. Membranes were then stripped and re-probed with  $\alpha$ -Akt antibody.

## Supplemental Figure S4

### SOD2 regulation by FOXO3a in response to DPI treatment

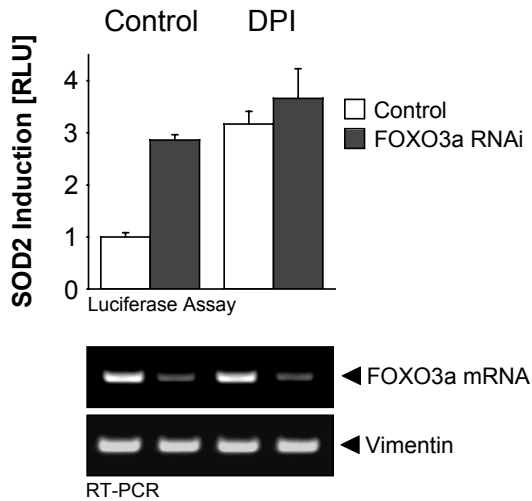

Cells were transfected with vector control (pSuper), or FOXO3a RNAi (pSuper FOXO3a) for 24 hr. Then cells were transfected a second time with reporter constructs and 8 hr after transfection, stimulated with DPI (1 $\mu$ M, 16hr). Reporter gene assays were performed to measure SOD2 gene reporter transcriptional activity (SOD2-luciferase reporter plasmid) or  $\beta$ -galactosidase activity (normalization). Error bars represent standard deviation (SD). FOXO3a down-regulation was measured using RT-PCR (Vimentin served as a control).

## Supplemental Figure S5

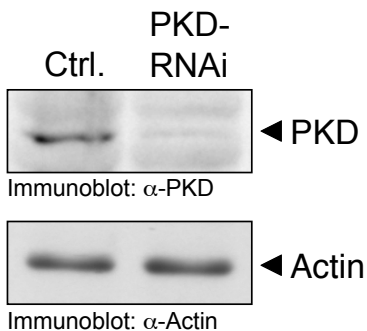

Cells were transfected with vector control (pSuper), or PKD RNAi (pSuper PKD1/2) for 48 hr. Cells were analyzed by Western Blot for silencing of PKD and seeded in 24 well plates for the experiments depicted in Figure 7A.
